# The Genomic History of the Middle East

Mohamed A. Almarri<sup>1,2\*</sup>, Marc Haber<sup>3,4\*</sup>, Reem A. Lootah<sup>2</sup>, Pille Hallast<sup>1,5</sup>,  
Saeed Al Turki<sup>6,7</sup>, Hilary C. Martin<sup>1</sup>, Yali Xue<sup>1</sup>, Chris Tyler-Smith<sup>1</sup>

<sup>1</sup>Wellcome Sanger Institute, Wellcome Genome Campus, Hinxton CB10 1SA, UK

<sup>2</sup>Department of Forensic Science and Criminology, Dubai Police GHQ, Dubai, United Arab Emirates.

<sup>3</sup>Institute of Cancer and Genomic Sciences, University of Birmingham, Birmingham B15 2TT, UK

<sup>4</sup>Centre for Computational Biology, University of Birmingham, Birmingham B15 2TT, UK

<sup>5</sup>Institute of Biomedicine and Translational Medicine, University of Tartu, Tartu, 50411, Estonia

<sup>6</sup>Translational Pathology, Department of Pathology and Laboratory Medicine, King Abdulaziz Medical City, Ministry of National Guard- Health Affairs, Riyadh, Saudi Arabia

<sup>7</sup>Department of Genetics & Genomics, College of Medicine and Health Sciences, United Arab Emirates University. Al Ain, United Arab Emirates

\*Correspondence: [ma17@sanger.ac.uk](mailto:ma17@sanger.ac.uk) (M.A.A), [m.haber@bham.ac.uk](mailto:m.haber@bham.ac.uk) (M.H.)

## Abstract

The Middle East is an important region to understand human evolution and migrations, but is underrepresented in genetic studies. We generated and analysed 137 high-coverage physically-phased genome sequences from eight Middle Eastern populations using linked-read sequencing. We found no genetic traces of early expansions out-of-Africa in present-day populations, but find Arabians have elevated Basal Eurasian ancestry that dilutes their Neanderthal ancestry. A divergence in population size within the region starts before the Neolithic, when Levantines expanded while Arabians maintained small populations that could have derived ancestry from local epipaleolithic hunter-gatherers. All populations suffered a bottleneck overlapping documented aridification events, while regional migrations increased genetic structure, and may have contributed to the spread of the Semitic languages. We identify new variants that show evidence of selection, some dating from the onset of the desert climate in the region. Our results thus provide detailed insights into the genomic and selective histories of the Middle East.

## 34 **Introduction**

35 Global whole-genome sequencing projects have provided insights into human diversity,  
36 dispersals, and past admixture events (Bergström *et al.*, 2020; Mallick *et al.*, 2016;  
37 GenomeAsia100K Consortium, 2019; 1000 Genomes Project Consortium *et al.*, 2015).  
38 However, many populations remain understudied, which restricts our understanding of  
39 genetic variation and population history, and may exacerbate health inequalities (Sirugo *et*  
40 *al.*, 2019). A region particularly understudied by large-scale sequencing projects is the  
41 Middle East. Situated between Africa, Europe and South Asia, it forms an important region to  
42 understand human evolution, history and migrations. The demographic history and  
43 prehistoric population movements of Middle Easterners are poorly understood, as are their  
44 relationships among themselves and to other global populations. The region contains some  
45 of the earliest evidence of modern humans outside Africa, with fossils dated to ~180  
46 thousand years ago (kya) and ~85 kya identified in the Levant and North West Arabia,  
47 respectively (Hershkovitz *et al.*, 2018; Groucutt *et al.*, 2018). In addition, tool kits suggesting  
48 their presence have been identified in South East Arabia dating to ~125 kya (Armitage *et al.*,  
49 2011). Although most of Arabia is a hyper-arid desert today, there were several humid  
50 periods resulting in a 'green Arabia' in the past which facilitated human dispersals, with the  
51 onset of the current desert climate thought to have started around 6 kya (Petraglia *et al.*,  
52 2020). The toggling from humid to arid periods has been proposed to result in population  
53 movements adapting to the climate. The Neolithic transition within Arabia may have  
54 developed independently within the region, or resulted from an expansion of Levantine  
55 Neolithic farmers southwards (Drechsler, 2009; Uerpmann, *et al.*, 2010; Crassard *et al.*,  
56 2013a; Crassard *et al.*, 2013b; Hilbert *et al.*, 2015). To address such questions, we  
57 generated and analysed a high-coverage physically-phased open-access dataset of  
58 populations from the Arabian Peninsula, the Levant and Iraq. In addition to creating a  
59 catalogue of genetic variation in an understudied region that will assist future medical  
60 studies, we have investigated the population structure, demographic and selective histories,  
61 and admixture events with modern and archaic humans.

62

63

64

65

66

67

## 68 **Results**

### 69 **Dataset and Sample Sequencing**

70 We sequenced 137 whole genomes from eight Middle Eastern populations (Figure 1A) to an  
71 average coverage of 32x using a library preparation method that preserves long-range  
72 information from short reads, and aligned them to the GRCh38 reference (Methods). An  
73 advantage of using this 'linked-read' technology is the reconstruction of physically-phased  
74 haplotypes and improved alignments at repetitive regions which confound short-read  
75 aligners (Figure S1). All populations investigated speak Arabic, a Semitic language of the  
76 Afro-Asiatic language family, with the exception of the Iraqi Kurdish group who speak  
77 Kurdish, an Iranian language belonging to the Indo-European family. After quality control  
78 (Methods) we identify 23.1 million single nucleotide variants (SNVs). We compared our  
79 dataset to variants identified in the recently released Human Genome Diversity Project  
80 (HGDP-CEPH) study (Bergström *et al.*, 2020). We find 4.9 million autosomal SNVs in our  
81 dataset that are not found in the HGDP. As expected, most of the new variants are rare  
82 (93%, < 1% minor allele frequency); however, ~370,000 are common (> 1%). Interestingly,  
83 most of these common variants are outside the accessibility mask defined by Bergstrom *et*  
84 *al.*, 2020 (~246,000). This illustrates the importance of sequencing genetically under-  
85 represented populations such as Middle Easterners and the inclusion of regional-private  
86 variants in future medical studies. It also demonstrates that a significant amount of unknown  
87 variation resides in regions that are not accessible to standard short-reads.

### 88 **Population Structure and Admixture**

89 Uncovering population structure and past admixture events is important for understanding  
90 population history and for designing and interpreting medical studies. We explored the  
91 structure and diversity of our dataset using both single-variant and haplotype-based  
92 methods. After merging our dataset with global populations, fineSTRUCTURE (Lawson *et*  
93 *al.*, 2012) identified genetic clusters that are concordant with geography, and showed that  
94 self-labelled populations generally formed distinct clusters (Figure 1D and S2). Populations  
95 from the Levant and Iraq (Lebanese, Syrians, Jordanians, Druze and Iraqi-Arabs) clustered  
96 together, while Iraqi-Kurds clustered with Central Iranian populations. Arabian populations  
97 (Emiratis, Saudis, Yemenis and Omanis) clustered with Bedouins (BedouinB) from the  
98 HGDP. The fineSTRUCTURE analysis thus allowed us to identify subpopulations who show  
99 minimal admixture, which we herein label 'core'.

100 We next analysed our samples in the context of ancient regional and global populations.  
101 Principal component analysis (Figures 1B and S3) shows that present-day Middle

102 Easterners are positioned between ancient Levantine hunter-gatherers (Natufians), Neolithic  
103 Levantines (Levant\_N), Bronze Age Europeans and ancient Iranians. Arabians and  
104 Bedouins are positioned close to ancient Levantines, while present-day Levantines are  
105 drawn towards Bronze Age Europeans. Iraqi Arabs, Iraqi Kurds and Assyrians appear  
106 relatively closer to ancient Iranians and are positioned near Bronze Age Armenians. We find  
107 that most present-day Middle Easterners can be modelled as deriving their ancestry from  
108 four ancient populations (Table S1): Levant\_N, Neolithic Iranians (Iran\_N), Eastern Hunter  
109 Gatherers (EHG), and a ~4,500 year old East African (Mota). We observe a contrast  
110 between the Levant and Arabia: Levantines have excess EHG ancestry (Figure S4), which  
111 we showed previously had arrived in the Levant after the Bronze Age along with people  
112 carrying ancient south-east European and Anatolian ancestry (Haber *et al.*, 2017, Haber *et*  
113 *al.* 2020). Our results here show this ancestry remained mostly confined to the Levant  
114 region. Another contrast between the Levant and Arabia is the excess of African ancestry in  
115 Arabian populations. We find that the closest source of African ancestry for most populations  
116 in our dataset is Bantu Speakers from Kenya, in addition to contributions from Nilo-Saharan  
117 speakers from Ethiopia specifically in the Saudi population. We estimate that African  
118 admixture in the Middle East occurred within the last 2,000 years, with most populations  
119 showing signals of admixture around 500-1,000 years ago (Figure S5 and Table S2).

120 In addition to differences in EHG and African ancestry, we observe an excess of Natufian  
121 ancestry in the South compared with the North (Figure S4). Model-based clustering also  
122 shows that Arabian populations have little Anatolia Neolithic (Anatolia\_N) ancestry compared  
123 with the modern-day Levantines (purple component in Figure 1C). This result is intriguing  
124 since Levant\_N shares significant ancestry with Anatolia\_N compared with the preceding  
125 local Natufian population (Lazaridis *et al.*, 2016), and a hypothesized Neolithic expansion  
126 from the Levant to Arabia should have also carried Anatolia\_N ancestry. The difference in  
127 ancient Anatolian ancestry could also be from post-Bronze Age events, which resulted in  
128 differences in EHG ancestry in the region (Haber *et al.*, 2020). When we substitute Levant\_N  
129 with Natufians, we found that Arabians could be successfully modelled (Table S1 and Figure  
130 S7), suggesting that they could derive all of their local ancestry from Natufians without  
131 requiring additional ancestry from Levant\_N. On the other hand, none of the present-day  
132 Levantines could be modelled as such.

133 In addition to the local ancestry from Epipaleolithic/Neolithic people, we find an ancestry  
134 related to ancient Iranians that is ubiquitous today in all Middle Easterners (orange  
135 component in Figure 1C; Table S1). Previous studies showed that this ancestry was not  
136 present in the Levant during the Neolithic period, but appears in the Bronze Age where

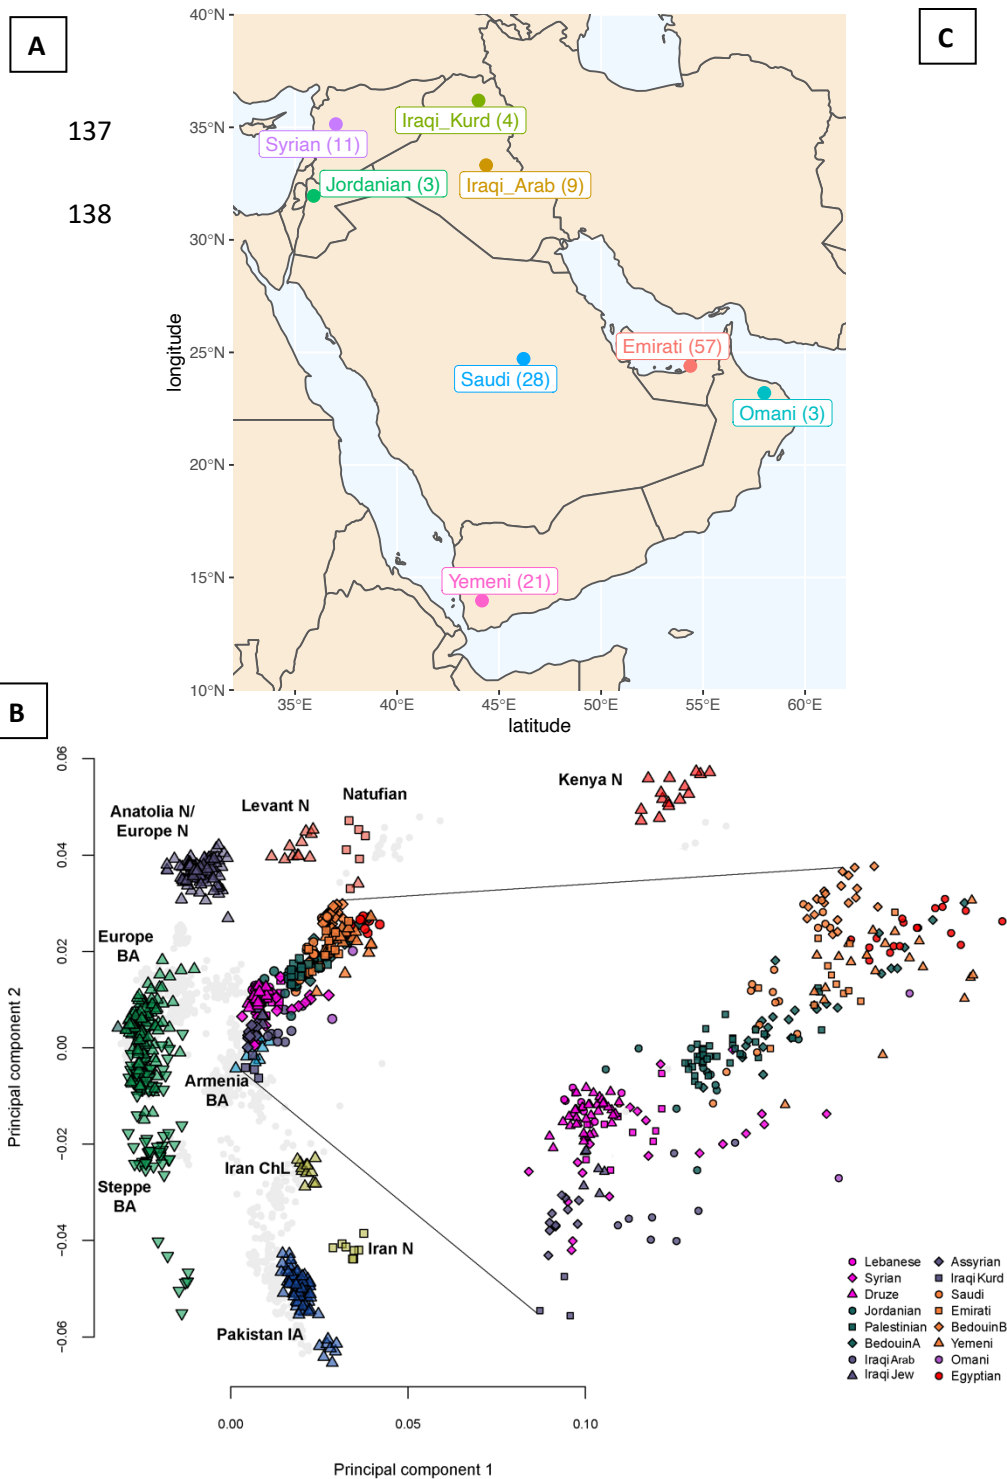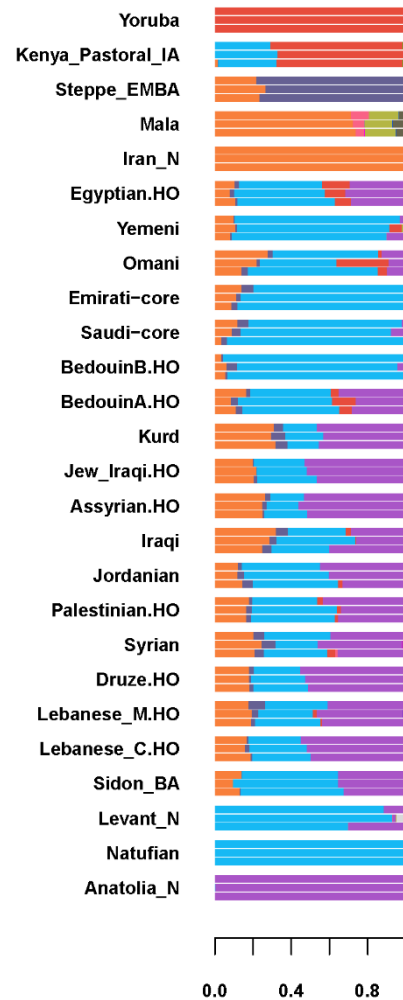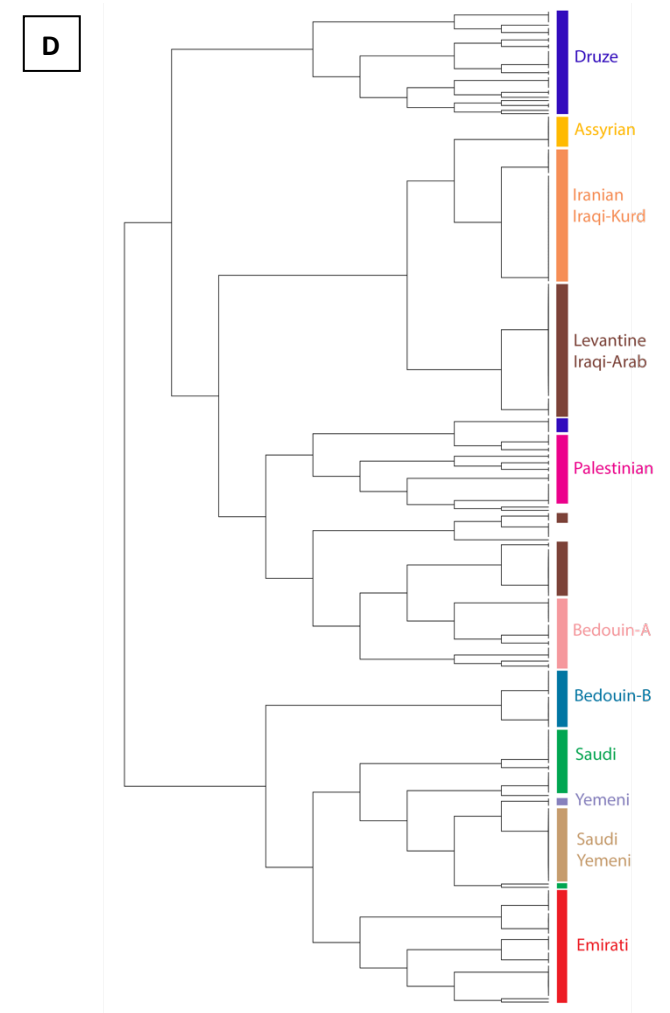

**Figure 1. Overview of the dataset and population structure of the Middle East.** **A)** Map illustrating the populations sampled in this study, with numbers in brackets illustrating number of individuals. **B)** Principal component analysis of ancient and modern populations. Eigenvectors were inferred with present-day populations from the Middle East, North and East Africa, Europe, Central and South Asia. The ancient samples were then projected onto the plot (all modern non-Middle Easterners shown as grey points). Plot also shows a magnification of the modern Middle Eastern cluster. See Figure S3 for more details. **C)** Temporally-aware model-based clustering using ~80,000 transversions and 9 time points. Showing K=13 when the Anatolia\_N and Natufian components split. See Figure S5 for more details. “.HO” suffix refers to samples from the Human Origins Dataset. **D)** Finestructure tree of modern-day Middle Easterners with population clusters highlighted. See Figure S2 for more details.

139 ~50% of the local ancestry was replaced by a population carrying ancient Iran-related  
140 ancestry (Lazaridis *et al.*, 2016). We explored whether this ancestry penetrated both the  
141 Levant and Arabia at the same time, and found that admixture dates mostly followed a North  
142 to South cline, with the oldest admixture occurring in the Levant region between 3,900 and  
143 5,600 ya (Table S3), followed by admixture in Egypt (2,900-4,700 ya), East Africa (2,200-  
144 3,300) and Arabia (2,000-3,800). These times overlap with the dates for the Bronze Age  
145 origin and spread of Semitic languages in the Middle East and East Africa estimated from  
146 lexical data (Kitchen *et al.*, 2009; Figure S8). This population potentially introduced the Y-  
147 chromosome haplogroup J1 into the region (Chiaroni *et al.*, 2010; Lazaridis *et al.*, 2016). The  
148 majority of the J1 haplogroup chromosomes in our dataset coalesce around ~5.6 [95% CI,  
149 4.8-6.5] kya, agreeing with a potential Bronze Age expansion; however, we do find rarer  
150 earlier diverged lineages coalescing ~17 kya (Figure S9). The haplogroup common in  
151 Natufians, E1b1b, is also frequent in our dataset, with most lineages coalescing ~8.3 [7-9.7]  
152 kya, though we also find a rare deeply divergent Y-chromosome which coalesces 39 kya  
153 (Figure S9).

#### 154 **Effective Population size and Separation History**

155 Historical effective population sizes can be inferred through the distribution of coalescence  
156 times between chromosomes sampled from a population (Li and Durbin, 2011). However,  
157 there is limited resolution in recent periods using single human genomes, while errors in  
158 haplotype phasing create artefacts when using multiple genomes (Schiffels and Durbin,  
159 2014; Terhorst *et al.*, 2017). Although methods have been developed that extend these  
160 approaches by incorporating the allele frequency spectrum from unphased genomes, they  
161 do not have resolution at recent times, for e.g. through the metal ages (Terhorst *et al.*, 2017;  
162 Bergström *et al.*, 2020). By leveraging recent advances in generating genome-wide  
163 genealogies (Speidel *et al.*, 2019), and the large number of physically-phased samples in  
164 our study, we could estimate the effective population size of each population in our dataset  
165 up to very recent times - 1 kya (Figure 2A and S16A). We found all Middle Easterners had a  
166 significant decrease in population size, around the out-of-Africa event ~50-70 kya. The  
167 recovery from this bottleneck follows a similar pattern until 15-20kya, when a contrast  
168 between the Levant and Arabia started to emerge. All Levantine and Iraqi populations  
169 continued to show a substantial population expansion, while Arabians maintained similar  
170 sizes. This contrast is noteworthy since it starts after the end of the Last Glacial Maximum  
171 and becomes prominent during the Neolithic, when agriculture developed in the Fertile  
172 Crescent and led to settled societies supporting larger populations. Following the Neolithic,  
173 and with the start of the aridification of Arabia around 6kya, Arabian populations experienced

174 a bottleneck while Levantines continued to increase in size. The expansion in Levantines  
175 then plateaus and their population size decreases around the 4.2 kiloyear aridification event  
176 (Weiss et al., 1993). The decline in Emiratis is especially prominent, reaching an effective  
177 population size of ~5,000, more than 20 times smaller than Levantines and Iraqis at the  
178 same time period. A recovery can be observed in the past 2 ky.

179 We next studied the population separation history of Middle Eastern populations among  
180 themselves and from global populations. The importance of accurate phasing in this analysis  
181 is illustrated by an earlier finding that suggested, based on statistically phased data, that  
182 modern-day Papuans harbour ancestry of an early expansion of modern humans out of  
183 Africa (Pagani *et al.*, 2016). However, this was not replicated using physically-phased  
184 genomes, suggesting it was caused by a statistical phasing artefact (Bergström *et al.*, 2020).  
185 Conversely, when exploring population separation history at recent times, rare variants  
186 become more informative but are less accurately phased by statistical methods, and are  
187 unlikely to be present in reference panels. We first tested whether present-day Middle  
188 Easterners harbour ancestry from an early human expansion out of Africa by comparing the  
189 split times of our populations with physically-phased samples from the HGDP (Figure 2B and  
190 S10). Using a relative cross-coalescent rate (rCCR) of 0.5 as a heuristic estimate of split  
191 time, we found that Levantines, Arabians, Sardinians and Han Chinese share the same split  
192 time, and additionally the same gradual pattern of separation, from Mbuti ~120kya. We then  
193 compared the populations in our dataset with Sardinians and found they split ~20 kya, with  
194 Levantines showing a slightly more recent divergence than Arabians. In contrast to the  
195 gradual separation patterns to Mbuti, Sardinians show more of a clean split to all Middle  
196 Eastern populations. Notably, all lineages within the Levant and Arabia, and in addition to  
197 lineages within all Middle Eastern populations and Sardinians, coalesce within 40 kya. These  
198 results collectively suggest that present-day Middle Eastern populations do not harbour any  
199 significant traces from an earlier expansion out of Africa, and all descend from the same  
200 population that expanded out of the continent ~50-60 kya.

201 We then compared the separation times of populations within the Middle East, and found the  
202 oldest divergence times were between Arabia and the Levant/Iraq (Figure 2C and S16B).  
203 The Emiratis split from Iraqi Kurds around 10 kya, and more recently around 7 kya from  
204 Jordanians, Syrians and Iraqi Arabs. Saudi split times from the same populations appear  
205 more recent, around 5-7 kya, while the Yemeni separation curves are intermediate between  
206 the Emirati and Saudi curves. The split times between Arabia and the Levant predate the  
207 Bronze Age, agreeing with our phylogenetic modelling that if a Bronze Age expansion into

208

209

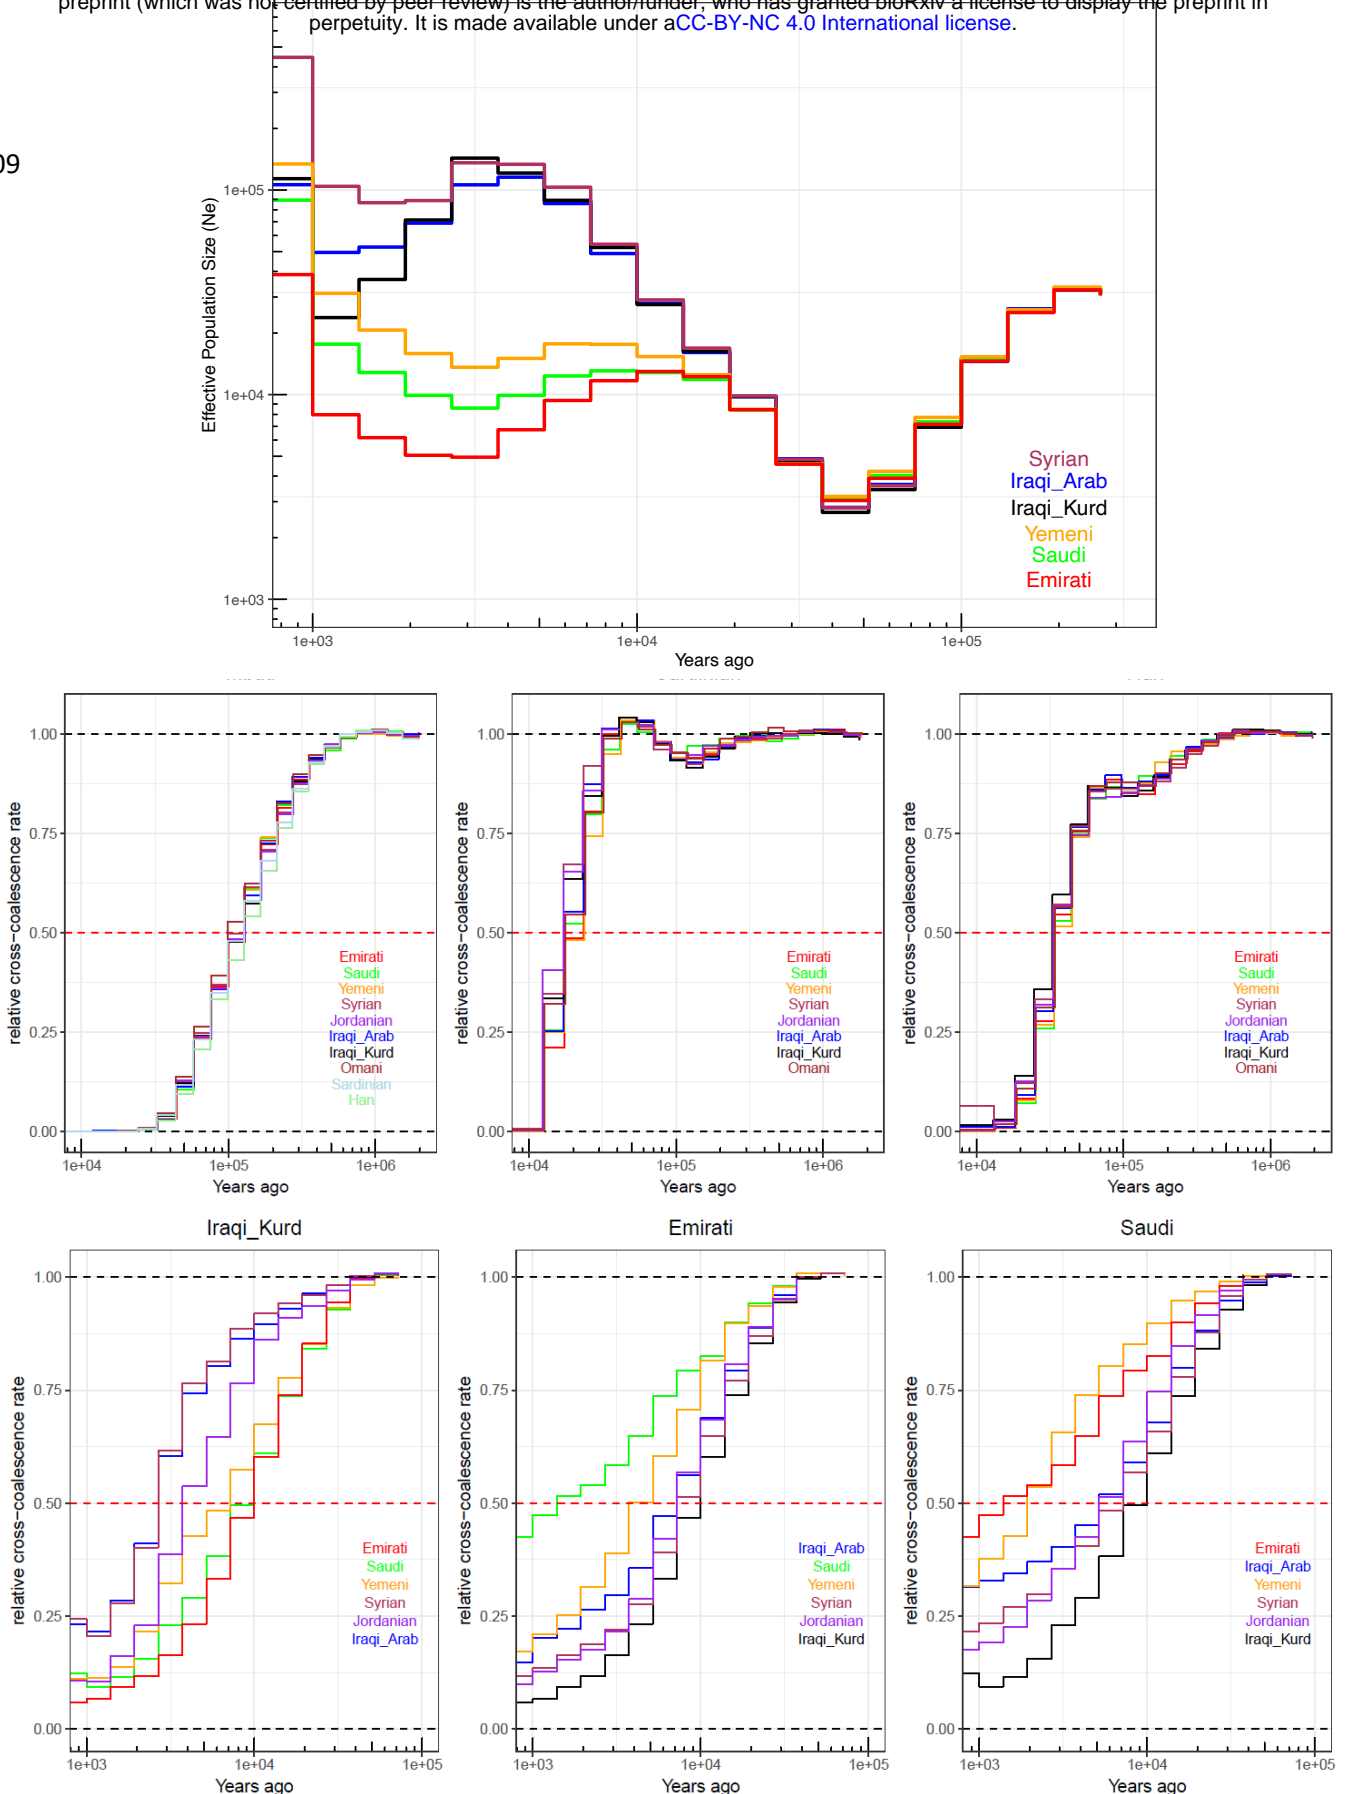

**Figure 2. Population size and separation history. Top)** Effective population size histories for Middle Eastern populations. More details in Figure S16A. **Center)** Separation history between Mbuti, Sardinians and Han (indicated at the top of each panel) with each of the Middle Eastern populations (identified within each panel). All Middle Eastern populations show similar split time with each of these global populations. **Bottom)** Separation history within the Middle East (population indicated at the top of each panel, and within each panel). More comparisons show in Figure S16B. Note the different X-axis scales.



210 Arabia occurred, it did not result in a complete replacement of ancestry.

211 Within the Levant and Iraq, all splits occurred in the past 3-4 ky. Within Arabia, Yemenis split  
212 from Emiratis ~4 kya and Saudis appear as the least divergent population to both the  
213 Emiratis and Yemenis, with recent splits within the last 2ky. The separation history of the  
214 region suggests continuous historical gene flow occurring between the Levant/Iraq and  
215 Central Arabia, and in addition between Central Arabia to the Southeast, and separately to  
216 the Southwest in Yemen.

### 217 **Archaic introgression and deep ancestry in the Middle East**

218 The similar amount of Neanderthal ancestry in most non-African populations and the low  
219 diversity of introgressed haplotypes suggest that modern humans likely experienced a single  
220 pulse of Neanderthal admixture as they expanded out of Africa (Bergström *et al.*, 2020).  
221 Middle Eastern populations have previously been shown to have lower Neanderthal ancestry  
222 than European and East Asian populations (Rodriguez-Flores *et al.*, 2016; Bergström *et al.*,  
223 2020); however, the interpretation of this finding is complicated by recent African admixture  
224 'diluting' Neanderthal ancestry (Haber *et al.*, 2016). In addition, some analyses require the  
225 use of an outgroup, which, if it itself contains Neanderthal ancestry, can bias estimates  
226 (Chen *et al.*, 2020). To investigate Neanderthal introgression in our dataset, we exploited the  
227 accurate phasing of our samples and compared cross-coalescent rates with the high  
228 coverage Vindija Neanderthal genome (Prüfer *et al.*, 2017). All Middle Easterners showed an  
229 archaic admixture signal at a time point similar to other Eurasians (Figure 3A).

230 We then used an identity-by-descent-based method, IBDmix, which directly compares a  
231 target population to the Neanderthal genome to detect haplotypes of Neanderthal origin  
232 (Chen *et al.*, 2020). We ran IBDmix on our samples and the HGDP dataset, recovering  
233 segments totalling ~1.27 Gb that are of likely Neanderthal origin. When comparing the  
234 amount of Neanderthal haplotypes that are private to our dataset but not present in other  
235 non-Middle Eastern Eurasians, we found only ~25 Mb in total, illustrating that the vast  
236 majority of Neanderthal haplotypes in the region are shared with other populations.  
237 However, we do find relatively large introgressed haplotypes (~500kb) that are very rare  
238 globally, but reach high frequencies in Arabia (Figure S12).

239 We then compared the average number of total Neanderthal bases per population, and  
240 found lower values in Arabia in comparison to other Eurasian populations, including  
241 Levantines. The Druze and Sardinians, for example, have similar amounts (average ~56.4  
242 Mb per individual) of Neanderthal ancestry (Figure 3B). In contrast, in Arabia, Emirati.core

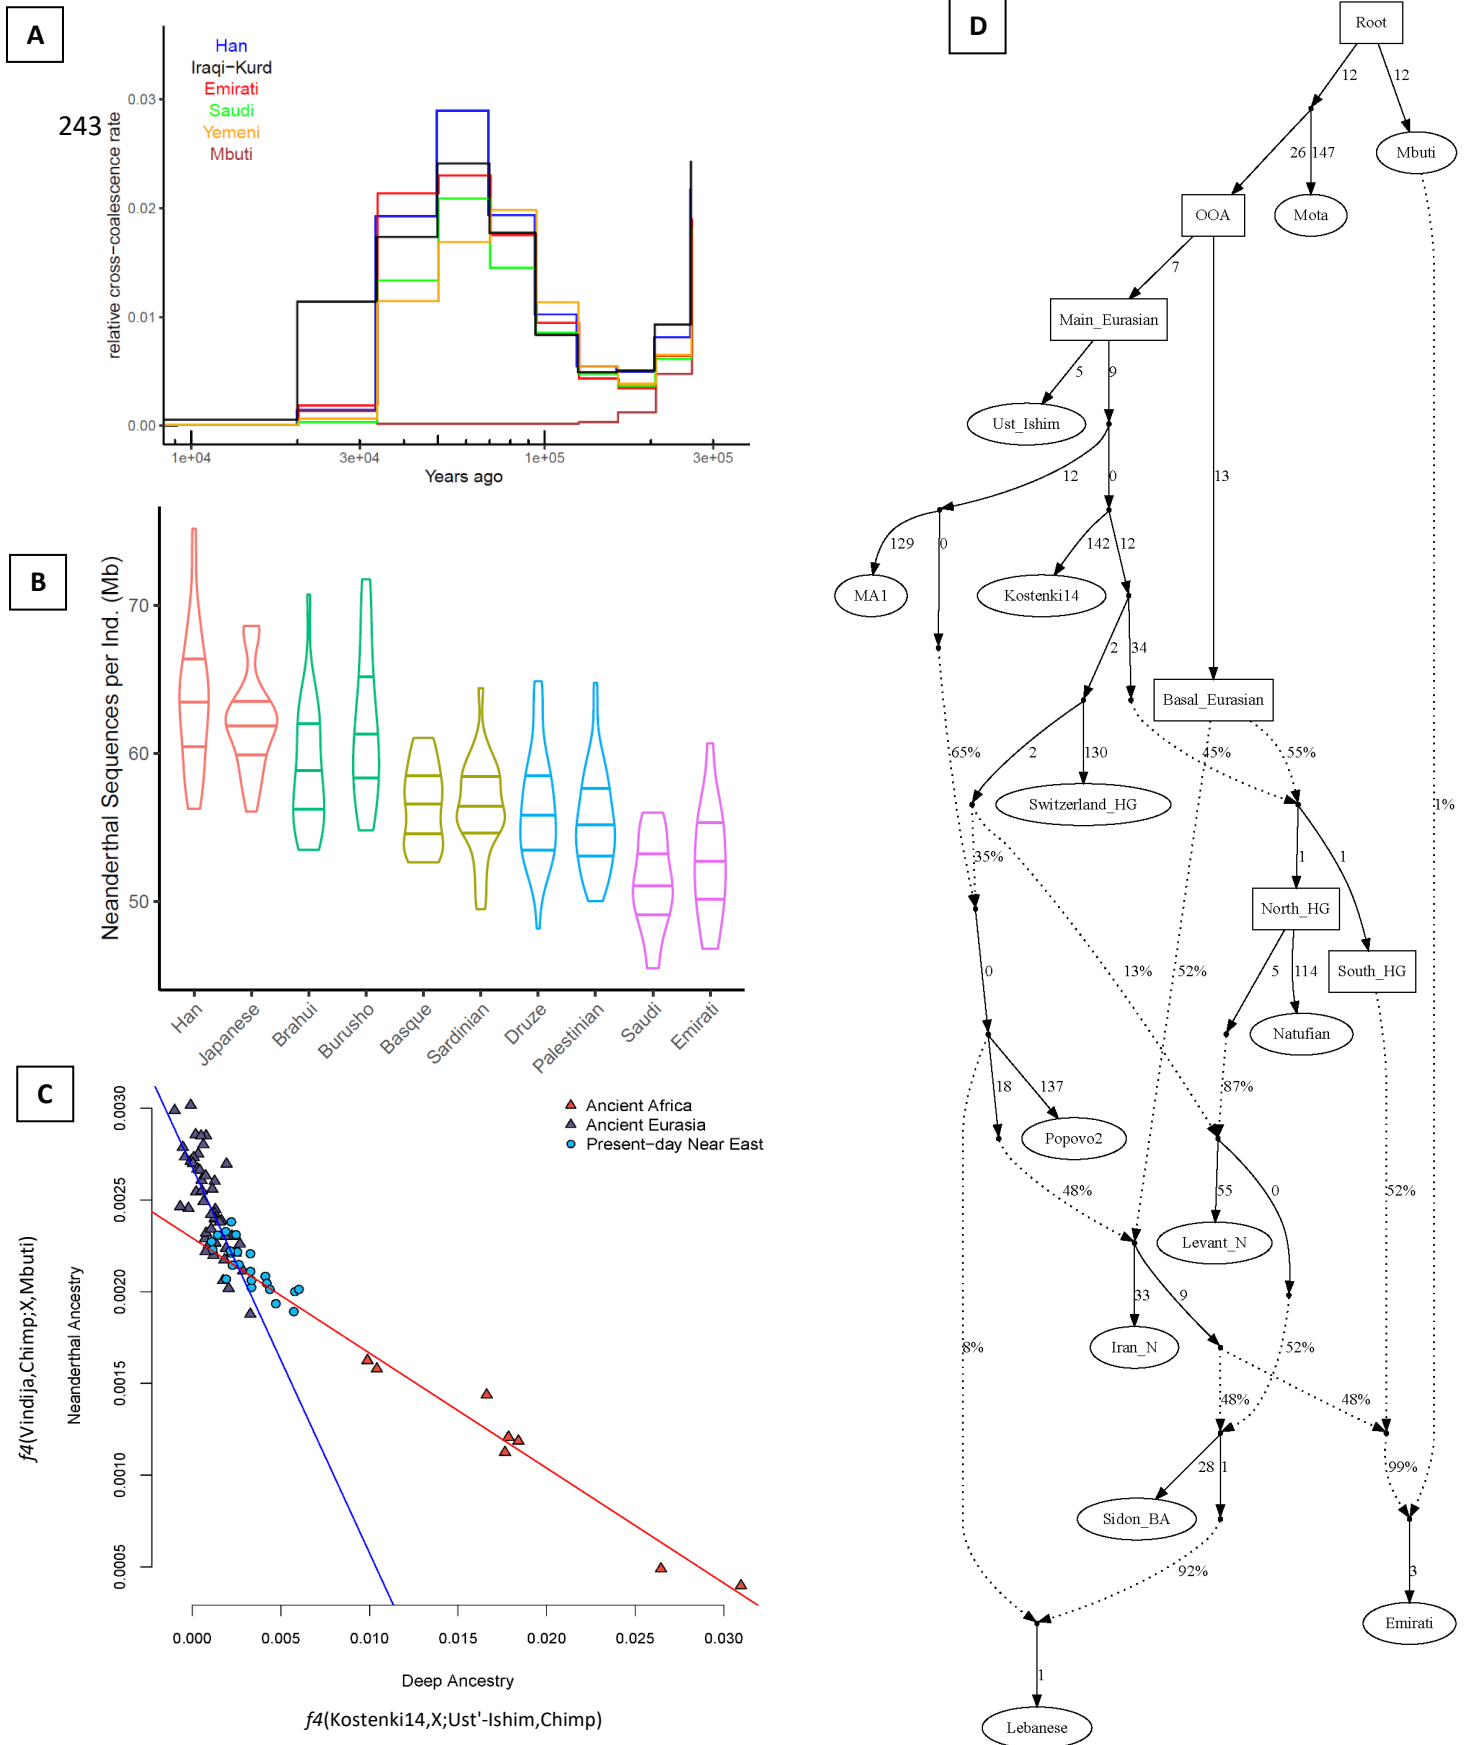

**Figure 3. Archaic introgression and deep structure in the Middle East. A)** Relative cross coalescent rate against Vindija Neanderthal. Note the y-axis range. **B)** Distribution of total length of Neanderthal sequences (Mb) per sample in each population. Horizontal lines depict 25%, 50%, and 75% quantiles. Colors reflect regional grouping. **C)** Neanderthal ancestry is negatively correlated with a deep ancestry in the Middle East. Two clines explain the depletion of Neanderthal Ancestry in Middle Easterners; one formed by basal Eurasian ancestry and the other is African ancestry. We plot regression lines using the ancient Africans (red) and the ancient Eurasians (blue). **D)** A possible model for the population formation in the Middle East. Populations in ellipses are sampled populations while populations in boxes are hypothetical. Worst f-statistics: (Lebanese, Emirati; Lebanese, Emirati) Z score = -2.83. See Figure S11 for alternative graph models. BA: Bronze Age; HG: Hunter-gatherer.

244 and Saudi.core have an average of 52.7 Mb and 52.1 Mb Neanderthal ancestry respectively,  
245 which is ~8% lower than the Druze and Sardinians, and ~20% less than Han Chinese. Since  
246 Emirati.core and Saudi.core have less than 3% of African ancestry, the depletion of  
247 Neanderthal ancestry in Arabia cannot be explained by the African ancestry alone. Lazaridis  
248 *et al.*, (2014) proposed that a basal Eurasian population, with low-to-no Neanderthal  
249 ancestry, had contributed different proportions to ancient and modern Eurasians, reaching  
250 ~50% in Neolithic Iranians and Natufians. Since Arabians have an excess of Natufian-like  
251 ancestry compared to elsewhere in the Middle East, we find they also carry an excess of  
252 basal Eurasian ancestry which will reduce their Neanderthal ancestry. In addition, most  
253 modern Middle Easterners carry African ancestry from recent admixture which also  
254 contributes to their deep ancestry (relative to the time of a main Eurasian ancestry). We find  
255 a negative correlation (Pearson's  $r = -0.81$ ,  $P = 2.76e-06$ ) between the increase in deep  
256 ancestry and the amount of Neanderthal ancestry in the modern Middle Easterners. When  
257 testing all ancient populations we find two clines (Figure 3C) explaining the depletion of  
258 Neanderthal ancestry: The first is formed by African ancestry while the second is formed by  
259 a Basal Eurasian ancestry in ancient Eurasians. Middle Easterners appear to be affected by  
260 both clines since they harbour both ancestries.

## 261 **Selection**

262 There is currently a limited understanding of the effects of selection in Arabian populations,  
263 with the current hyper-arid climate and a long-term nomad-like subsistence potentially  
264 exerting selective pressure for adaptations. To explore this, we searched genome-wide  
265 genealogies for lineages carrying mutations that have spread unusually quickly (Speidel *et*  
266 *al.*, 2019) at a conservative genome-wide threshold ( $P < 5 \times 10^{-8}$ ). Previous studies identified  
267 two correlated variants (rs41380347 and rs55660827), distinct from the known European  
268 variant (rs4988235), that are associated with lactase persistence in Arabia (Imtiaz *et al.*  
269 2007; Enattah *et al.* 2008). For the Arabian variant rs41380347, we found evidence for  
270 strong selection ( $s = 0.011$ ,  $\log LR = 13.27$ ), similar to, but slightly weaker than, the reported  
271 strength of selection at rs4988235 in Europeans ( $s = 0.016-0.018$ ; Mathieson and Mathieson  
272 2018; Stern *et al.* 2019). The variant is present at highest frequency in the core Arabian  
273 populations: ~50% in Saudis and Emiratis, and at a much lower frequency in the Levant and  
274 Iraq (4%). Remarkably, the variant is not present in any Eurasian or African population in the  
275 1000 Genome Project (1KG). We also did not find the variant in published ancient Eurasian  
276 whole genomes, including ancient Levantines and Iranians, consistent with a recent origin of  
277 the haplotype within the Middle East and subsequent increase in frequency due to selection.  
278 We find the variant had a rapid increase in frequency between 9 kya and the present day

279 (Figure 4B). Notably, this period overlaps with the transition from a hunter-gatherer to a  
280 herder-gatherer lifestyle in Arabia (Petraglia *et al.* 2020).

281 We also identified additional variants that show an increase in frequency recently (Figure  
282 4C-D. A variant within *LMTK2*, rs11762534, which is also an eQTL for many genes, displays  
283 evidence of selection ( $s=0.005$ ; logLR = 16.49) and is associated with blood cell percentages  
284 and malignant neoplasm of prostate. *LMTK2* encodes a serine/threonine kinase that is  
285 implicated in diverse cellular processes including apoptosis, growth factor signalling and  
286 appears essential for spermatogenesis in mice (Kawa *et al.*, 2006; Cruz *et al.*, 2019).  
287 Outside the Middle East, the variant is highly stratified and is present at the highest  
288 frequency in Europeans (1KG, 45%), but we find it at 66% frequency in the Arabian  
289 populations. Intriguingly, the variant also shows differentiation in BedouinB (81%), while  
290 appearing less frequent in Druze and Palestinians (both ~55%). We additionally looked for  
291 strongly differentiated variants between Arabia and the Levant/Iraq (Figure S13). The variant  
292 showing the most extreme population branch statistic in Yemenis is rs2814778, where the  
293 derived allele results in the Duffy-null phenotype and is almost exclusively found in African  
294 populations in the 1000 Genome Project. However, the variant is very common in Yemenis  
295 (74%), and decreases in frequency moving northwards in the peninsula (59% in Saudis  
296 while reaching 6% in Iraqi-Arabs). We find that across the genome this locus shows the  
297 highest enrichment of African ancestry in the Middle East (Methods). As the average amount  
298 of African ancestry in Yemenis and Saudis is ~9% and ~3% respectively, the high frequency  
299 of this variant appears consistent with positive selection after African admixture. It has been  
300 thought that the derived allele protects against *Plasmodium vivax* infection (Miller *et al.*,  
301 1976), which has been historically present in Arabia.

302 An advantage of using genome-wide genealogies is its power to detect relatively weak  
303 selection. We subsequently searched for evidence of polygenic adaptation in Arabian  
304 populations across 20 polygenic traits specifically over the past 2,000 years (Methods). For  
305 most traits, we find no, or inconclusive, evidence for recent directional selection, including  
306 height, skin colour, and BMI (Figure 4A). However a few traits do show evidence, with  
307 selection for higher years of education (EduYears) showing the strongest signal consistent  
308 across all Arabian populations ( $P = 0.0002$  in Saudis). This has also been reported in the  
309 British population (Stern *et al.*, 2020); however, the signal was shown to become attenuated  
310 after conditioning on other traits, suggesting indirect selection via a correlated trait. In  
311 contrast to findings in the British population (Stern *et al.*, 2020), we do not find selection  
312 acting on traits such as sunburn, hair color and tanning ability. Within Arabia, the direction of  
313 selection on most traits appears to be similar across populations, likely as a result of shared

314 ancestry; however, we note that the current varied environments across the region can  
315 potentially cause different recent selective pressures. In Emiratis, we find evidence of  
316 selection on variants increasing type 2 diabetes (T2D,  $P = 0.004$ ). This result is intriguing, as  
317 the prevalence of T2D in Emiratis is among the highest globally and is partly thought to  
318 result from strong recent shift to a sedentary lifestyle (Malik *et al.*, 2005). We also find  
319 nominal evidence of selection acting to increase levels of low-density lipoproteins (LDL;  $P =$   
320 0.01) and decrease levels of Apolipoprotein B (APOB;  $P = 0.01$ ) in the same population; but  
321 they appear suggestive after adjusting for multiple testing ( $P_{adj} = 0.06$  at 5% FDR).

## 322 **Discussion**

323 In this study we have generated a high-coverage open-access resource from the genetically  
324 understudied Middle East region. To our knowledge, this is the first study where the whole  
325 population investigated is experimentally-phased, allowing the reconstruction of large and  
326 accurate haplotypes. We find millions of variants that are not catalogued in previous global  
327 sequencing projects, with a significant proportion being common in the Middle East. A  
328 majority of these common variants reside outside of short-read accessibility masks,  
329 highlighting the limitation of standard short-read sequencing based studies.

330 The large number of physically-phased haplotypes allowed us to study population history  
331 from relatively old periods (>100 kya) to very recent times (1 kya). We find no evidence that  
332 an early expansion of humans out of Africa has contributed genetically to present-day  
333 populations in the region. This finding adds to the growing consensus that all contemporary  
334 non-African modern humans descend from a single expansion out-of-Africa, quickly followed  
335 by admixture with Neanderthals, before populating the rest of the world (Mallick *et al.*, 2016;  
336 Bergstrom *et al.*, 2020). We find that Middle Eastern populations have very little Neanderthal  
337 DNA that is private to the region, with the vast majority shared with other Eurasians. We  
338 demonstrate that Arabian populations have lower Neanderthal ancestry than Levantine,  
339 European and East Asian populations and attribute this difference to elevated ancestry from  
340 a basal Eurasian population, which did not admix with Neanderthals, in addition to recent  
341 African admixture.

342 By modelling contemporary populations using ancient genomes, we identify differences  
343 between the Levant and Arabia. The Levant today have higher European/Anatolian-related  
344 ancestry and Arabia having higher African and Natufian-like ancestry. The contrast between  
345 the regions is also illustrated by their population-size histories which diverge before the  
346 Neolithic and suggest that the transition to a sedentary agricultural lifestyle allowed the

347

348

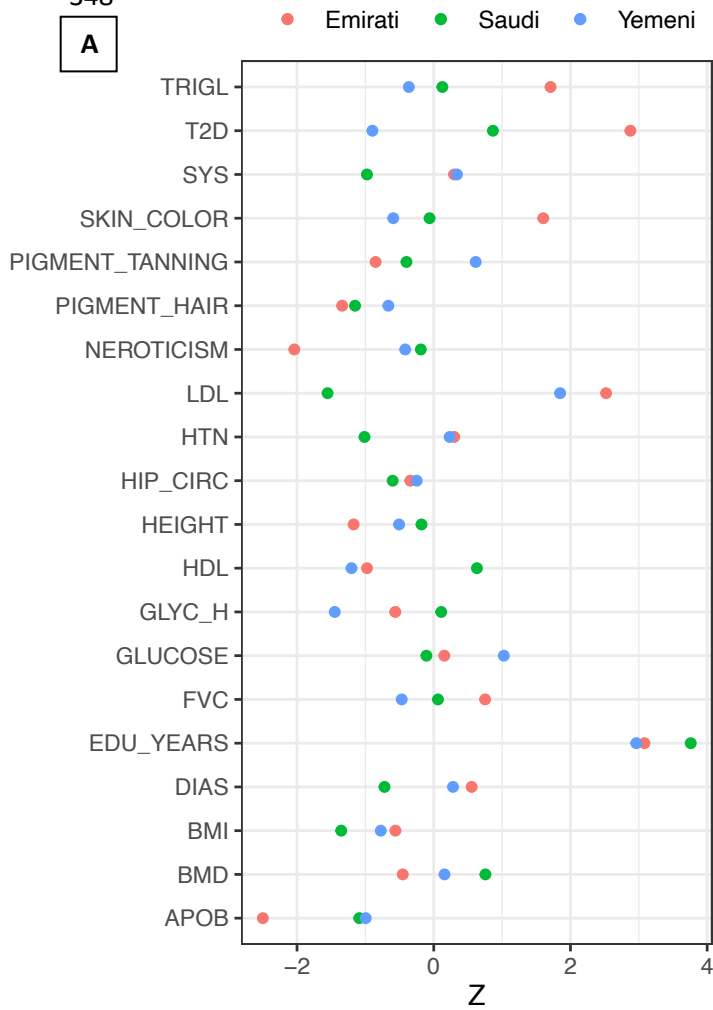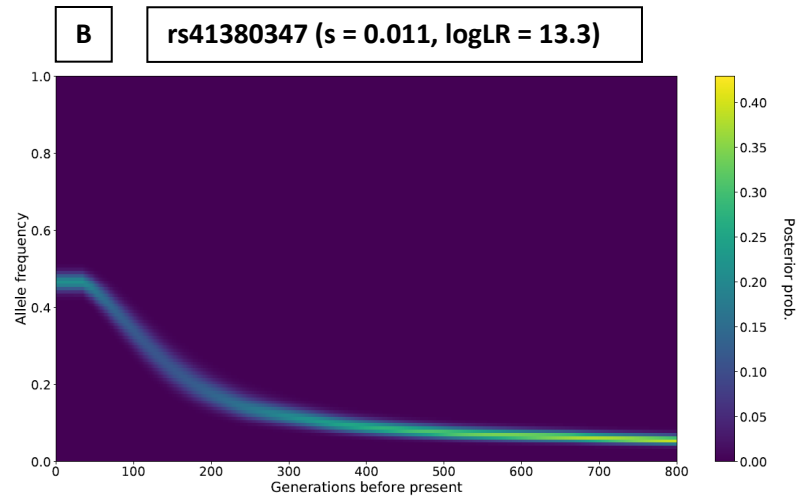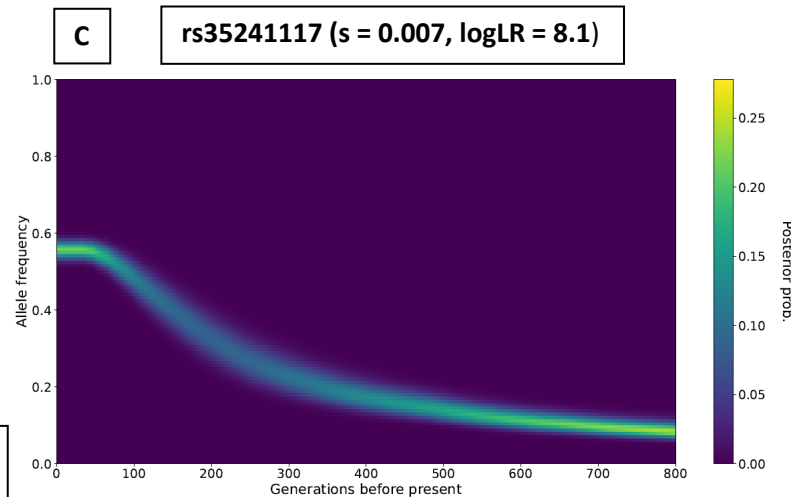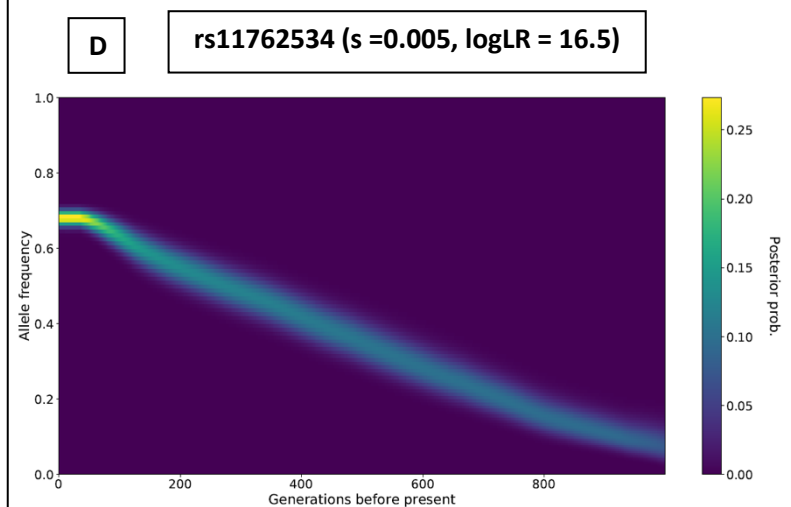

**Figure 4. Selection in Arabia. A)** Testing for recent polygenic selection, over the past 2000 years, on 20 traits within Arabian populations. Asterisks indicate the test is significant after correcting for multiple testing (FDR = 5%). TRIGL: Triglycerides; T2D: Type2 Diabetes; SYS: Systemic Blood Pressure; LDL: Low-density lipoproteins; HTN: Hypertension; HIP\_CIRC: Hip circumference; HDL: High-density lipoproteins; GLYC\_H: Glycosylated haemoglobin; FVC: Forced Vital Capacity; EDU\_YEARS: Years of Education; DIAS: Diastolic blood pressure; BMI: Body Mass Index; BMD: Bone Mass Density; APOB: Apolipoprotein B **B)** Historical allele trajectory of rs41380347 which is associated with lactase persistence and almost private to the Middle East.  $s$  = selection coefficient. **C)** Frequency trajectory of rs35241117, located near *TNKS*, which is present at the highest frequency in Arabia globally and is associated with multiple traits including glomerular filtration rate, bone mineral density, BMI, standing height and hypertension. **D)** Frequency trajectory of rs11762534 which is associated with lymphocyte and neutrophil percentages and prostate neoplasm malignancy and is also present at the highest frequency in Arabia.  $s$  = selection coefficient.

349 growth of populations in the Levant, but was not paralleled in Arabia. It has been suggested  
350 that population discontinuity occurred between the late Pleistocene and Early Holocene in  
351 Arabia, and that the peninsula was repopulated by Neolithic farmers from the Fertile  
352 Crescent (Uerpmann *et al.*, 2010). Our results do not support a complete replacement of the  
353 Arabian populations by Levantine farmers. In addition our models suggest that Arabians  
354 could have derived their ancestry from Natufian-like local hunter-gatherer populations  
355 instead of Levantine farmers.

356 An additional source of ancestry needed to model modern Middle Easterners is related to  
357 ancient Iranians. Our admixture tests show that this ancestry first reached the Levant, and  
358 subsequently reached Egypt, East Africa and Arabia. The timings of these events  
359 interestingly overlap with the origin and spread of the Semitic languages (Kitchen *et al.*,  
360 2009), suggesting a potential population carrying this ancestry may have spread the  
361 language. We find climate change associated aridification events to coincide with population  
362 bottlenecks, with Arabians decreasing in size 6kya with the onset of the desert climate while  
363 Levantines around the 4.2 kiloyear aridification event. This severe drought has been  
364 suggested to have caused the collapse of kingdoms and empires in the Middle East and  
365 South Asia, potentially reflected genetically in the signal we identify (Weiss, 2017). Future  
366 ancient DNA studies from Arabia are needed to refine the formation of the Arabian  
367 populations.

368 The application of ancestral recombination graphs to reconstruct the evolutionary history of  
369 variants offers a powerful method to study natural selection. We refine and identify new  
370 signals of selection in Arabian populations. The example of the lactase persistence  
371 associated variant, which during the past few thousand years increased to a frequency  
372 reaching 50% and is almost absent outside the region, demonstrates the importance of  
373 studying underrepresented populations to understand human history and adaptations. Our  
374 results indicate that polygenic selection might have played a role in increasing the frequency  
375 of variants that were potentially beneficial in the past, but today are associated with diseases  
376 such as T2D. We find few signals of polygenic selection in Arabian populations, which may  
377 be a consequence of their long-term small effective population sizes which will theoretically  
378 reduce the strength of selection. We also note that Middle Eastern populations are among  
379 the most understudied populations included in GWAS (Sirugo *et al.*, 2019), which limits the  
380 analysis of polygenic traits. Our study and the recent establishment of national biobanks in  
381 the region are a step forward to reduce these disparities and offer an exciting opportunity to  
382 explore, in the future, complex and disease traits in the Middle East.

383

## 384 **Acknowledgements**

385 We are grateful to Matthew Hurles, Richard Durbin and members of the Tyler-Smith and  
386 Martin groups for constructive discussions and comments. We would particularly like to  
387 thank the participants for donating samples for this study. We acknowledge the Department  
388 of Forensic Science and Criminology at Dubai Police GHQ for allowing us to use their  
389 facilities. We thank Faisal Al-Hedeithy, Parwar Hamad, Tariq Zeyad and Mohamed Naji for  
390 help with sample collections. M.A.A. was supported by the Government of Dubai - Dubai  
391 Police GHQ. C.T.-S and Y.X. were supported by Wellcome grant 098051. P.H. was  
392 supported by Estonian Research Council Grant PUT1036.

## 393 **Author contributions**

394 M.A.A., Y.X. and C.T-S. conceived this study. M.A.A. and M.H. designed and performed the  
395 analyses with contributions from P.H. M.A.A., M.H. Y.X. and C.T-S interpreted the results  
396 with input from H.C.M. R.A.L coordinated sample collection and extraction. S.A.T assisted in  
397 study design. M.A.A. and M.H. wrote the manuscript. Y.X. and C.T-S. supervised the work.  
398 All authors approved the final version of the paper. All authors declare no conflict of interest.

399

## 400 **Data availability**

401 Raw read alignments are available from the European Nucleotide Archive (ENA) under study  
402 accession number xxxx. Phased VCFs are available on xxxx.

403

## 404 **References**

- 405 1000 Genomes Project Consortium *et al.* (2015) 'A global reference for human genetic  
406 variation', *Nature*, 526(7571), pp. 68–74.
- 407 Armitage, S. J. *et al.* (2011) 'The Southern Route "Out of Africa": Evidence for an Early  
408 Expansion of Modern Humans into Arabia', *Science*, pp. 456–459. doi:  
409 10.1126/science.1199113.
- 410 Bergström, A. *et al.* (2020) 'Insights into human genetic variation and population history from  
411 929 diverse genomes', *Science*, 367(6484). doi: 10.1126/science.aay5012.
- 412 Chen, L. *et al.* (2020) 'Identifying and Interpreting Apparent Neanderthal Ancestry in African  
413 Individuals', *Cell*, pp. 677–687.e16. doi: 10.1016/j.cell.2020.01.012.
- 414 Chiaroni, J. *et al.* (2010) 'The emergence of Y-chromosome haplogroup J1e among Arabic-  
415 speaking populations', *European journal of human genetics: EJHG*, 18(3), pp. 348–353.
- 416 Crassard, R. *et al.* (2013) 'Beyond the Levant: first evidence of a pre-pottery Neolithic  
417 incursion into the Nefud Desert, Saudi Arabia', *PLoS one*, 8(7), p. e68061.
- 418 Crassard, R. and Drechsler, P. (2013) 'Towards new paradigms: multiple pathways for the  
419 Arabian Neolithic', *Arabian Archaeology and Epigraphy*, pp. 3–8. doi: 10.1111/aae.12021.
- 420 Cruz, D. F., Farinha, C. M. and Swiatecka-Urban, A. (2019) 'Unraveling the Function of  
421 Lemur Tyrosine Kinase 2 Network', *Frontiers in pharmacology*, 10, p. 24.
- 422 Drechsler, P. (2009) 'The Dispersal of the Neolithic over the Arabian Peninsula'. doi:  
423 10.30861/9781407305028.



- 424 Enattah, N. S. *et al.* (2008) 'Independent introduction of two lactase-persistence alleles into  
425 human populations reflects different history of adaptation to milk culture', *American journal of*  
426 *human genetics*, 82(1), pp. 57–72.
- 427 GenomeAsia100K Consortium (2019) 'The GenomeAsia 100K Project enables genetic  
428 discoveries across Asia', *Nature*, 576(7785), pp. 106–111.
- 429 Groucutt, H. S. *et al.* (2018) 'Homo sapiens in Arabia by 85,000 years ago', *Nature Ecology*  
430 *& Evolution*, pp. 800–809. doi: 10.1038/s41559-018-0518-2.
- 431 Haber, M. *et al.* (2016) 'Chad Genetic Diversity Reveals an African History Marked by  
432 Multiple Holocene Eurasian Migrations', *American journal of human genetics*, 99(6), pp.  
433 1316–1324.
- 434 Haber, M. *et al.* (2017) 'Continuity and Admixture in the Last Five Millennia of Levantine  
435 History from Ancient Canaanite and Present-Day Lebanese Genome Sequences', *The*  
436 *American Journal of Human Genetics*, pp. 274–282. doi: 10.1016/j.ajhg.2017.06.013.
- 437 Haber, M. *et al.* (2020) 'A Genetic History of the Middle East from an aDNA Time Course  
438 Sampling Eight Points in the Past 4,000 Years', *The American Journal of Human Genetics*,  
439 pp. 149–157. doi: 10.1016/j.ajhg.2020.05.008.
- 440 Hershkovitz, I. *et al.* (2018) 'The earliest modern humans outside Africa', *Science*,  
441 359(6374), pp. 456–459.
- 442 Hilbert, Y. H. *et al.* (2015) 'Archaeological evidence for indigenous human occupation of  
443 Southern Arabia at the Pleistocene/ Holocene transition: The case of al-Hatab in Dhofar,  
444 Southern Oman', *Paléorient*, pp. 31–49. doi: 10.3406/paleo.2015.5674.
- 445 Imtiaz, F. *et al.* (2007) 'The T/G 13915 variant upstream of the lactase gene (LCT) is the  
446 founder allele of lactase persistence in an urban Saudi population', *Journal of medical*  
447 *genetics*, 44(10), p. e89.
- 448 Kitchen, A. *et al.* (2009) 'Bayesian phylogenetic analysis of Semitic languages identifies an  
449 Early Bronze Age origin of Semitic in the Middle East', *Proceedings. Biological sciences /*  
450 *The Royal Society*, 276(1668), pp. 2703–2710.
- 451 Lawson, D. J. *et al.* (2012) 'Inference of population structure using dense haplotype data',  
452 *PLoS genetics*, 8(1), p. e1002453.
- 453 Lazaridis, I. *et al.* (2014) 'Ancient human genomes suggest three ancestral populations for  
454 present-day Europeans', *Nature*, 513(7518), pp. 409–413.
- 455 Lazaridis, I. *et al.* (2016) 'Genomic insights into the origin of farming in the ancient Middle  
456 East', *Nature*, 536(7617), pp. 419–424.
- 457 Li, H. and Durbin, R. (2011) 'Inference of human population history from individual whole-  
458 genome sequences', *Nature*, 475(7357), pp. 493–496.
- 459 Malik, M. *et al.* (2005) 'Glucose intolerance and associated factors in the multi-ethnic  
460 population of the United Arab Emirates: results of a national survey', *Diabetes research and*  
461 *clinical practice*, 69(2), pp. 188–195.
- 462 Mallick, S. *et al.* (2016) 'The Simons Genome Diversity Project: 300 genomes from 142  
463 diverse populations', *Nature*, 538(7624), pp. 201–206.

- 464 Mathieson, S. and Mathieson, I. (2018) 'FADS1 and the Timing of Human Adaptation to  
465 Agriculture', *Molecular Biology and Evolution*, pp. 2957–2970. doi: 10.1093/molbev/msy180.
- 466 Miller, L. H. *et al.* (1976) 'The resistance factor to Plasmodium vivax in blacks. The Duffy-  
467 blood-group genotype, FyFy', *The New England journal of medicine*, 295(6), pp. 302–304.
- 468 Pagani, L. *et al.* (2016) 'Genomic analyses inform on migration events during the peopling of  
469 Eurasia', *Nature*, 538(7624), pp. 238–242.
- 470 Petraglia, M. D. *et al.* (2020) 'Human responses to climate and ecosystem change in ancient  
471 Arabia', *Proceedings of the National Academy of Sciences*, pp. 8263–8270. doi:  
472 10.1073/pnas.1920211117.
- 473 Prüfer, K. *et al.* (2017) 'A high-coverage Neandertal genome from Vindija Cave in Croatia',  
474 *Science*, 358(6363), pp. 655–658.
- 475 Rodriguez-Flores, J. L. *et al.* (2016) 'Indigenous Arabs are descendants of the earliest split  
476 from ancient Eurasian populations', *Genome research*, 26(2), pp. 151–162.
- 477 Schiffels, S. and Durbin, R. (2014) 'Inferring human population size and separation history  
478 from multiple genome sequences', *Nature genetics*, 46(8), pp. 919–925.
- 479 Sirugo, G., Williams, S. M. and Tishkoff, S. A. (2019) 'The Missing Diversity in Human  
480 Genetic Studies', *Cell*, p. 1080. doi: 10.1016/j.cell.2019.04.032.
- 481 Speidel, L. *et al.* (2019) 'A method for genome-wide genealogy estimation for thousands of  
482 samples', *Nature genetics*, 51(9), pp. 1321–1329.
- 483 Stern, A. J. *et al.* (2020) 'Disentangling selection on genetically correlated polygenic traits  
484 using whole-genome genealogies'. doi: 10.1101/2020.05.07.083402. *bioRxiv*
- 485 Stern, A. J., Wilton, P. R. and Nielsen, R. (2019) 'An approximate full-likelihood method for  
486 inferring selection and allele frequency trajectories from DNA sequence data'. *PLOS*  
487 *Genetics* doi: 10.1101/592675.
- 488 Terhorst, J., Kamm, J. A. and Song, Y. S. (2017) 'Robust and scalable inference of  
489 population history from hundreds of unphased whole genomes', *Nature Genetics*, pp. 303–  
490 309. doi: 10.1038/ng.3748.
- 491 Uerpmann, H.-P., Potts, D. T. and Uerpmann, M. (2010) 'Holocene (Re-)Occupation of  
492 Eastern Arabia', *The Evolution of Human Populations in Arabia*, pp. 205–214. doi:  
493 10.1007/978-90-481-2719-1\_15.
- 494 Weiss, H. *et al.* (1993) 'The genesis and collapse of third millennium north mesopotamian  
495 civilization', *Science*, 261(5124), pp. 995–1004.
- 496 Harvey Weiss (ed.). (2017) *Megadrought and collapse: from early agriculture to Angkor*.  
497 Oxford: Oxford University Press; 978-0-19-932919-9
- 498
